# Supplementary material
Source: PubMed Central journal article supplement (PMC2427209)
Supplement: mmc1.pdf [file mmc1.pdf]

## Article

### Arrhythmogenic Right Ventricular Cardiomyopathy Type 5

### Is a Fully Penetrant, Lethal Arrhythmic Disorder

### Caused by a Missense Mutation in the *TMEM43* Gene

Nancy D. Merner, Kathy A. Hodgkinson, Annika F. M. Haywood, Sean Connors, Vanessa M. French, Jörg-Detlef Drenckhahn, Christine Kupprion, Kalina Ramadanova, Ludwig Thierfelder, William McKenna, Barry Gallagher, Lynn Morris-Larkin, Anne S. Bassett, Patrick S. Parfrey, and Terry-Lynn Young

**Table S1. Sequencing Variants Identified through Mutation Screening**

| Locus  | Accession Number | Primer Exon Name | Variation Name  |                | Amino Acid Change | Genomic Number of Variant | Samples  | BB04-66 |          | WP05-218 |          | CH04-81 |            | GT04-141 |            | GP05-219 |            | MH05-244 |     | MS06-114 |     |
|--------|------------------|------------------|-----------------|----------------|-------------------|---------------------------|----------|---------|----------|----------|----------|---------|------------|----------|------------|----------|------------|----------|-----|----------|-----|
|        |                  |                  |                 |                |                   |                           |          | Family  | AR1      |          | AR15     |         | AR1        |          | AR8        |          | AR15       |          | AR1 |          | AR2 |
|        |                  |                  | Clinical Status | Affected       |                   |                           | Affected |         | Affected |          | Affected |         | Unaffected |          | Unaffected |          | Unaffected |          |     |          |     |
|        |                  |                  | Chromosome      | 1              |                   |                           | 2        | 1       | 2        | 1        | 2        | 1       | 2          | 1        | 2          | 1        | 2          | 1        | 2   | 1        | 2   |
| IQSEC1 | NM_014869        | 14c              | 3'UTR A>G       | 2892+1060 A>G  |                   | 12914829                  |          | A       | A        | nd       | nd       | A       | A          | A        | A          | A        | A          | nd       | nd  | A        | G   |
| IQSEC1 | NM_014869        | 14c              | 3'UTR C>T       | 2892+1343 C>T  |                   | 12914546                  |          | T       | T        | T        | T        | T       | T          | T        | T          | T        | T          | T        | T   | T        | T   |
| IQSEC1 | NM_014869        | 9                | IVS9+60 T>C     | 2358+60 T>C    |                   | 12929868                  |          | C       | C        | nd       | nd       | C       | C          | C        | C          | C        | C          | C        | C   | C        | C   |
| IQSEC1 | NM_014869        | 8                | IVS8+73C>T      | 2232+73 C>T    |                   | 12931531                  |          | T       | T        | T        | C        | T       | T          | T        | T          | C        | T          | C        | T   | C        | T   |
| Marker | <i>D3S3610</i>   |                  |                 | Start 12980656 |                   |                           |          | 246     | 246      | 256      | 242      | nd      | nd         | 246      | 242        | 256      | 242        | 246      | 242 | nd       | nd  |
| IQSEC1 | NM_014869        | 1                | IVS1+73C>G      | 65+73 C>G      |                   | 12983814                  |          | nd      | nd       | nd       | nd       | C       | C          | C        | G          | C        | C          | C        | C   | C        | C   |
| Marker | <i>D3S2403</i>   |                  |                 | Start 13147397 |                   |                           |          | 251     | 279      | nd       | nd       | nd      | nd         | nd       | nd         | nd       | nd         | nd       | nd  | nd       | nd  |
| NUP210 | NM_024923        | 40d              | 3'UTR T>C       | 5664+1195T>C   |                   | 13332986                  |          | C       | C        | C        | T        | C       | C          | C        | T          | C        | T          | C        | T   | C        | T   |
| NUP210 | NM_024923        | 40c              | 3'UTR G>A       | 5664+1051G>A   |                   | 13333130                  |          | A       | A        | A        | G        | A       | A          | A        | G          | A        | G          | A        | G   | A        | G   |
| NUP210 | NM_024923        | 40c              | 3'UTR A>C       | 5664+1010 A>C  |                   | 13333171                  |          | C       | C        | C        | A        | C       | C          | C        | A          | C        | A          | C        | A   | C        | A   |
| NUP210 | NM_024923        | 40c              | 3'UTR C>T       | 5664+977 C>T   |                   | 13333204                  |          | T       | T        | T        | C        | T       | T          | T        | C          | T        | C          | T        | C   | T        | C   |
| NUP210 | NM_024923        | 40b              | 3'UTR A>T       | 5664+365 A>T   |                   | 13333816                  |          | A       | A        | A        | A        | A       | A          | A        | T          | A        | A          | A        | A   | A        | A   |
| NUP210 | NM_024923        | 38&39            | IVS39+59 G>A    | 5563+59 G>A    |                   | 13335513                  |          | A       | A        | A        | G        | A       | A          | A        | G          | A        | G          | A        | G   | A        | G   |
| NUP210 | NM_024923        | 38&39            | IVS39+9 C>G     | 5563+9 C>G     |                   | 13335563                  |          | C       | G        | C        | G        | C       | G          | C        | G          | C        | C          | C        | C   | G        | C   |
| NUP210 | NM_024923        | 37               | IVS37+25 G>A    | 5383+25 G>A    |                   | 13336238                  |          | A       | A        | A        | G        | A       | A          | A        | G          | A        | G          | A        | G   | A        | G   |
| NUP210 | NM_024923        | 37               | 5339 G>A        | 5339 G>A       | V>M               | 13336287                  |          | A       | A        | A        | G        | A       | A          | A        | G          | A        | G          | A        | G   | A        | G   |

|               |                  |          |                      |                     |     |                 |  |     |     |     |     |     |     |     |     |     |     |     |     |     |     |
|---------------|------------------|----------|----------------------|---------------------|-----|-----------------|--|-----|-----|-----|-----|-----|-----|-----|-----|-----|-----|-----|-----|-----|-----|
| NUP210        | NM_024923        | 37       | 5225 T>C             | 5225 T>C            | L>S | 13336391        |  | C   | C   | C   | C   | C   | C   | C   | C   | C   | C   | C   | T   | C   | T   |
| NUP210        | NM_024923        | 34       | 4701 C>A             | 4701 C>A            | T>T | 13339876        |  | A   | A   | A   | G   | A   | A   | A   | G   | A   | G   | A   | G   | A   | G   |
| NUP210        | NM_024923        | 33       | 4582 C>T             | 4582 C>T            | R>W | 13342357        |  | C   | C   | C   | C   | C   | C   | C   | T   | C   | C   | C   | C   | C   | C   |
| NUP210        | NM_024923        | 33       | 4533 G>A             | 4533 G>A            | S>S | 13342406        |  | A   | A   | A   | G   | A   | A   | A   | G   | A   | G   | A   | G   | A   | G   |
| NUP210        | NM_024923        | 32       | 4332C>T              | 4332C>T             | C>C | 13343892        |  | C   | C   | C   | T   | C   | C   | C   | T   | C   | T   | C   | T   | C   | T   |
| NUP210        | NM_024923        | 26       | 3489 G>A             | 3489 G>A            | E>E | 13354400        |  | G   | G   | G   | A   | G   | G   | G   | A   | G   | A   | G   | A   | G   | A   |
| NUP210        | NM_024923        | 26       | IVS25 -35 C>T        | 3472 -35 C>T        |     | 13354452        |  | C   | C   | C   | C   | C   | C   | C   | T   | C   | T   | C   | T   | C   | C   |
| NUP210        | NM_024923        | 22&23    | 3048 T>C             | 3048 T>C            | F>F | 13358540        |  | T   | T   | T   | C   | T   | T   | T   | C   | T   | C   | T   | C   | T   | C   |
| NUP210        | NM_024923        | 22&23    | IVS21 -26 C>T        | 2965 -26 C>T        |     | 13358649        |  | C   | C   | C   | C   | C   | C   | C   | C   | C   | T   | C   | T   | C   | C   |
| NUP210        | NM_024923        | 21       | IVS21 +143 C>T       | 2964 +143 C>T       |     | 13359532        |  | C   | C   | C   | T   | C   | C   | C   | C   | C   | C   | C   | C   | C   | C   |
| NUP210        | NM_024923        | 17       | 2461 C>G             | 2461 C>G            | P>A | 13370475        |  | C   | C   | C   | C   | C   | C   | C   | G   | C   | G   | C   | G   | C   | C   |
| NUP210        | NM_024923        | 17       | 2357 G>T             | 2357 G>T            | R>L | 13370579        |  | G   | G   | G   | T   | G   | G   | G   | T   | G   | T   | G   | T   | G   | T   |
| NUP210        | NM_024923        | 16       | 2264 C>T             | 2264 C>T            | A>V | 13374786        |  | C   | C   | C   | T   | C   | C   | C   | C   | C   | C   | C   | C   | T   | C   |
| NUP210        | NM_024923        | 16       | IVS15 -53 A>G        | 2155 -53 A>G        |     | 13374948        |  | A   | A   | A   | G   | A   | A   | A   | A   | A   | A   | A   | A   | G   | A   |
| NUP210        | NM_024923        | 14       | 1822 A>G             | 1822 A>G            | I>V | 13382556        |  | A   | A   | A   | G   | A   | A   | A   | G   | A   | G   | A   | G   | A   | G   |
| NUP210        | NM_024923        | 9        | IVS8 -64 ins         | 1046 -64 ins        |     | 13394126        |  | wt  | wt  | wt  | ins | wt  | ins | wt  |
| NUP210        | NM_024923        | 8        | IVS8 +29 G>T         | 1045 +29 G>T        |     | 13395383        |  | G   | T   | G   | G   | G   | G   | G   | G   | G   | G   | G   | G   | G   | T   |
| NUP210        | NM_024923        | 7        | IVS7 +39 G>A         | 976 +39 G>A         |     | 13396024        |  | G   | G   | G   | G   | G   | G   | G   | G   | G   | A   | G   | G   | G   | G   |
| NUP210        | NM_024923        | 7        | 889 G>A              | 889 G>A             | A>T | 13396150        |  | G   | G   | G   | A   | G   | G   | G   | A   | G   | A   | G   | A   | G   | A   |
| NUP210        | NM_024923        | 7        | IVS6 -98 A>G         | 818 -98 A>G         |     | 13396320        |  | A   | A   | A   | G   | A   | A   | A   | G   | A   | G   | A   | G   | A   | G   |
| NUP210        | NM_024923        | 6        | IVS5 -91 C>A         | 685 -91 C>A         |     | 13402998        |  | C   | C   | C   | A   | C   | C   | C   | C   | C   | C   | C   | C   | A   | C   |
| NUP210        | NM_024923        | 3        | IVS3 +27 T>C         | 436 +27 T>C         |     | 13413830        |  | T   | T   | T   | C   | T   | T   | T   | C   | T   | C   | T   | C   | T   | C   |
| NUP210        | NM_024923        | 3        | IVS2 -17 T>C         | 305 -17 T>C         |     | 13414005        |  | T   | T   | T   | C   | T   | T   | T   | T   | T   | T   | T   | T   | T   | T   |
| NUP210        | NM_024923        | 1        | IVS1+130G>A          | 166 +130G>A         |     | 13436430        |  | G   | G   | G   | A   | G   | G   | G   | G   | G   | G   | G   | G   | G   | G   |
| HDAC11        | NM_024827        | 2        | IVS2 +79 C>T         | 151 +79 C>T         |     | 13497973        |  | C   | C   | C   | C   | C   | T   | C   | C   | C   | C   | C   | C   | T   | C   |
| HDAC11        | NM_024827        | 3        | IVS3 +24 G>T         | 252 +24 G>T         |     | 13500088        |  | G   | G   | G   | G   | G   | G   | G   | G   | G   | G   | G   | G   | G   | T   |
| <b>HDAC11</b> | <b>NM_024827</b> | <b>4</b> | <b>IVS4 +19 insG</b> | <b>369 +19 insG</b> |     | <b>13513371</b> |  | ins | wt  | ins | ins | ins | wt  | ins | wt  |
| HDAC11        | NM_024827        | 7        | IVS6 -97 C>T         | 490 -97 C>T         |     | 13518274        |  | C   | C   | C   | C   | C   | C   | C   | T   | C   | C   | C   | C   | C   | C   |
| HDAC11        | NM_024827        | 8        | IVS7 -74 G>A         | 553 -74 G>A         |     | 13519310        |  | G   | G   | G   | G   | G   | G   | G   | A   | G   | G   | G   | G   | G   | G   |
| FBLN2         | DA856838         | EST 4    | del GT               |                     |     | 13586337        |  | del | del | del | wt  | del | wt  | del | wt  |
| FBLN2         | DA856838         | EST 4    | G>A                  |                     |     | 13586424        |  | G   | G   | G   | G   | G   | G   | G   | G   | A   | G   | G   | G   | G   | G   |
| FBLN2         | NM_001004019     | Ex2C #2  | del**                |                     |     | 13587794        |  | del |
| FBLN2         | NM_001004019     | Ex2C #2  | 1081 A>G             |                     |     | 13587937        |  | A   | A   | A   | A   | A   | A   | A   | A   | A   | G   | A   | A   | A   | A   |

|        |                |           |                |                |     |          |  |     |     |     |     |     |     |     |     |     |     |     |     |    |     |
|--------|----------------|-----------|----------------|----------------|-----|----------|--|-----|-----|-----|-----|-----|-----|-----|-----|-----|-----|-----|-----|----|-----|
| FBLN2  | BC111426       | EST1      | G>A            |                |     | 13627967 |  | G   | G   | G   | A   | G   | A   | G   | G   | G   | G   | G   | G   | G  | G   |
| FBLN2  | BC111426       | EST1      | A>G            |                |     | 13628401 |  | A   | A   | A   | G   | A   | G   | A   | A   | A   | G   | A   | A   | A  | G   |
| Marker | <i>D3S1516</i> |           |                | Start 13628628 |     |          |  | 347 | 359 | 351 | 359 | 347 | 351 | 347 | 335 | 351 | 343 | 351 | 363 | nd | nd  |
| FBLN2  | NM_001004019   | 5         | IVS5 +18 C>T   |                |     | 13630683 |  | C   | C   | C   | C   | C   | C   | C   | C   | C   | T   | C   | C   | C  | C   |
| FBLN2  | BF368851       | EST 6     | C>G            |                |     | 13637585 |  | G   | G   | G   | G   | G   | G   | G   | G   | G   | G   | G   | C   | G  | C   |
| FBLN2  | NM_001004019   | 11        | IVS11 +68 T>G  |                |     | 13644538 |  | G   | G   | G   | G   | G   | G   | G   | G   | G   | G   | G   | T   | G  | T   |
| FBLN2  | NM_001004019   | 12        | 2646 A>G       |                |     | 13645482 |  | G   | G   | G   | G   | G   | G   | G   | G   | G   | A   | G   | A   | G  | A   |
| FBLN2  | NM_001004019   | 12        | 2701 A>G       |                |     | 13645537 |  | G   | G   | G   | G   | G   | G   | G   | G   | G   | A   | G   | A   | G  | A   |
| FBLN2  | NM_001004019   | 13        | 2826 T>C       |                |     | 13645777 |  | C   | C   | C   | C   | C   | C   | C   | C   | C   | C   | C   | T   | C  | T   |
| FBLN2  | NM_001004019   | 13        | IVS13 +45 T>G  | 2842 +45 T>G   |     | 13645838 |  | G   | G   | G   | G   | G   | G   | G   | G   | T   | G   | T   | G   | T  | G   |
| FBLN2  | NM_001004019   | 15        | IVS15 +77G>C   | 3085 +77 G>C   |     | 13647393 |  | G   | C   | G   | C   | G   | C   | G   | C   | G   | G   | G   | C   | G  | C   |
| FBLN2  | W70042         | EST 2     | A>T            |                |     | 13649190 |  | T   | A   | T   | A   | T   | A   | T   | A   | A   | A   | T   | A   | A  | A   |
| FBLN2  | NM_001004019   | Ex 17     | IVS17 +105 G>T | 3338 +105 G>T  |     | 13653174 |  | G   | G   | G   | T   | G   | T   | G   | G   | T   | T   | G   | T*  | G  | T*  |
| FBLN2  | NM_001004019   | 18a       | IVS17 -18 G>A  | 3339 -18 G>A   |     | 13654045 |  | G   | G   | G   | A   | G   | G   | G   | G   | A   | A   | G   | G   | G  | G   |
| FBLN2  | NM_001004019   | 18a       | 3480 G>A       |                |     | 13654204 |  | G   | G   | G   | A   | G   | G   | G   | G   | A   | A   | G   | G   | G  | G   |
| FBLN2  | NM_001004019   | 18a       | 3612 C>T       |                |     | 13654336 |  | C   | C   | C   | T   | C   | C   | C   | C   | T   | T   | C   | C   | C  | C   |
| FBLN2  | NM_001004019   | 18b-3'UTR | G>A            |                |     | 13654616 |  | G   | A   | G   | A   | G   | G   | nd  | nd  | G   | G   | G   | A   | G  | A   |
| FBLN2  | NM_001004019   | 18b-3'UTR | T>A            |                |     | 13654689 |  | T   | A   | T   | T   | T   | T   | nd  | nd  | T   | T   | T   | T   | T  | A   |
| FBLN2  | NM_001004019   | 18b-3'UTR | C>A            |                |     | 13654696 |  | C   | A   | C   | C   | C   | C   | nd  | nd  | C   | C   | C   | C   | C  | A?  |
| FBLN2  | NM_001004019   | 18b-3'UTR | C>A            |                |     | 13654709 |  | C   | A   | C   | C   | C   | A   | nd  | nd  | C   | C   | C   | C   | C  | A   |
| FBLN2  | NM_001004019   | 18b-3'UTR | C>T            |                |     | 13654830 |  | C   | T   | C   | T   | C   | T   | nd  | nd  | T   | T   | C   | C   | C  | T   |
| FBLN2  | NM_001004019   | 18b-3'UTR | del TA         |                |     | 13654852 |  | wt  | del | wt  | wt  | wt  | del | nd  | nd  | wt  | wt  | wt  | wt  | wt | del |
| FBLN2  | NM_001004019   | 18b-3'UTR | T>A            |                |     | 13654856 |  | T   | T   | T   | A   | T   | T   | nd  | nd  | A   | A   | T   | T   | T  | T   |
| Marker | <i>D3S3608</i> |           |                | Start 13670236 |     |          |  | 165 | 165 | 165 | 165 | 165 | 175 | 165 | 165 | 165 | 165 | 165 | 165 | nd | nd  |
| WNT7A  | NM_004625      | 4a#1      | IVS3 -37 T>C   | 571 -37T>C     |     | 13835958 |  | T   | T   | T   | C   | T   | T   | T   | T   | T   | T   | T   | C   | T  | T   |
| Marker | <i>D3S2385</i> |           |                | Start 13853945 |     |          |  | 146 | 142 | nd  | nd  | nd  | nd  | 146 | 146 | nd  | nd  | nd  | nd  | nd | nd  |
| WNT7A  | NM_004625      | 3         | 459 T>C        | 459 T>C        | S>S | 13871141 |  | C   | T   | C   | C   | C   | T   | C   | T   | C   | T   | T   | T   | T  | T   |
| WNT7A  | NM_004625      | 3         | 315 G>A        | 315 G>A        | A>A | 13871285 |  | A   | G   | A   | A   | A   | G   | A   | G   | A   | G   | G   | G   | G  | G   |

|               |                  |               |                      |                           |               |                 |  |     |     |     |      |     |     |     |     |    |     |    |    |    |    |
|---------------|------------------|---------------|----------------------|---------------------------|---------------|-----------------|--|-----|-----|-----|------|-----|-----|-----|-----|----|-----|----|----|----|----|
| WNT7A         | NM_004625        | 2             | IVS2 +37 C>A         | 298 +37 C>A               |               | 13891408        |  | C   | A   | C   | C    | C   | C   | nd  | nd  | nd | nd  | C  | A  | C  | A  |
| WNT7A         | AA405144         | EST1-Ex2      | A>G                  |                           |               | 13892334        |  | A   | G   | A   | G    | A   | A   | G   | G   | G  | G   | A  | G  | A  | G  |
| WNT7A         | AA405144         | EST1-Ex1      | delG                 |                           |               | 13893611        |  | wt  | wt  | wt  | delG | wt  | wt  | wt  | wt  | wt | wt  | wt | wt | wt | wt |
| WNT7A         | NM_004625        | 1b            | 5'UTR C>A            | 1 -164 C>A                |               | 13896478        |  | C   | C   | C   | A    | C   | C   | C   | C   | C  | C   | C  | C  | C  | C  |
| Marker        | D3S3602          |               | Start 13900968       |                           |               |                 |  | 113 | 119 | 113 | 111  | 113 | 113 | 123 | 119 | 11 | 119 | 10 | nd | nd | nd |
| Marker        | D3S1585          |               | Start 13916682       |                           |               |                 |  | 118 | 126 | 118 | 118  | 118 | 126 | 126 | 126 | 12 | 118 | 13 | nd | nd | nd |
| TPRXL         | AK092426         | Ex2           | IVS1 -9 ins/delTTT   | ATTT microsatellite       |               | 14079871        |  | 8   | 6   | 8   | 9    | 8   | 8   | 6   | 6   | 6  | 8   | 6  | 8  | 7  | 7  |
| TPRXL         | AK092426         | Ex2           | IVS2 +81 A>G         | 5' UTR                    |               | 14080090        |  | A   | G   | A   | A    | A   | A   | G   | G   | G  | G   | G  | G  | nd | nd |
| CHCHD4        | NM_144636        | BC033775 Ex 3 | 3'UTR A>C            |                           |               | 14129232        |  | A   | A   | A   | A    | A   | A   | C   | C   | C  | A   | C  | C  | C  | C  |
| CHCHD4        | NM_144636        | BC033775 Ex 2 | IVS3 +36 G>C         | 160 +36 G>C               |               | 14132891        |  | G   | G   | G   | G    | G   | G   | G   | G   | G  | C   | G  | G  | G  | G  |
| CHCHD4        | NM_144636        | BC033775 Ex 2 | IVS3 +13 T>C         | 160 +13 T>C               |               | 14132914        |  | T   | T   | T   | T    | T   | T   | T   | T   | T  | C   | T  | T  | T  | T  |
| CHCHD4        | NM_144636        | BC033775 Ex 1 | 5'UTR A>G            |                           |               | 14141281        |  | G   | G   | G   | G    | G   | G   | G   | G   | G  | G   | G  | A  | G  | G  |
| TMEM43        | NM_024334        | 4             | IVS3 -106 C>T        | 298 -106 C>T              |               | 14147975        |  | C   | C   | C   | C    | C   | C   | T   | C   | T  | C   | C  | C  | C  | C  |
| TMEM43        | NM_024334        | 5&6           | IVS5 +51 T>C         | 442 +51 T>C               |               | 14149147        |  | T   | T   | T   | T    | T   | T   | nd  | nd  | T  | T   | C  | C  | C  | C  |
| TMEM43        | NM_024334        | 7             | IVS6 -90 G>A         | 513 -90 G>A               |               | 14150150        |  | G   | G   | G   | G    | G   | G   | G   | G   | G  | A   | G  | G  | G  | G  |
| TMEM43        | NM_024334        | 7             | 536 T>C              |                           | M>T           | 14150263        |  | T   | T   | T   | T    | T   | T   | C   | C   | C  | T   | T  | T  | C  | C  |
| TMEM43        | NM_024334        | 8&9           | IVS8 +55 G>A         | 705 +55 G>A               |               | 14151447        |  | G   | G   | G   | G    | G   | G   | A   | A   | A  | G   | G  | G  | A  | A  |
| TMEM43        | NM_024334        | 10            | IVS9 -56 G>A         | 781 -56 G>A               |               | 14152252        |  | G   | G   | G   | G    | G   | G   | A   | A   | A  | G   | G  | G  | A  | A  |
| TMEM43        | NM_024334        | 11            | IVS10 -47 C>T        | 883 -47 C>T               |               | 14155634        |  | C   | C   | C   | C    | C   | C   | C   | C   | C  | C   | T  | C  | T  | T  |
| <b>TMEM43</b> | <b>NM_024334</b> | <b>12a</b>    | <b>1073 C&gt;T</b>   |                           | <b>S&gt;L</b> | <b>14158166</b> |  | T   | C   | T   | C    | T   | C   | C   | C   | C  | C   | C  | C  | C  | C  |
| <b>TMEM43</b> | <b>NM_024334</b> | <b>12a</b>    | <b>3' UTR T&gt;C</b> | <b>c.1203 +115 T&gt;C</b> |               | <b>14158411</b> |  | T   | T   | T   | T    | T   | T   | C   | C   | C  | C   | C  | C  | C  | C  |
| TMEM43        | NM_024334        | 12b           | 3' UTR C>T           |                           |               | 14158573        |  | C   | C   | C   | C    | C   | T   | C   | C   | C  | C   | C  | C  | C  | C  |
| TMEM43        | NM_024334        | 12b           | 3' UTR A>G           |                           |               | 14158759        |  | A   | A   | A   | A    | A   | A   | A   | A   | A  | A   | G  | A  | G  | G  |
| TMEM43        | NM_024334        | 12c           | 3' UTR A>C           |                           |               | 14159075        |  | A   | A   | A   | A    | A   | A   | A   | A   | A  | A   | C  | A  | C  | C  |
| TMEM43        | NM_024334        | 12d           | 3' UTR T>C           |                           |               | 14159670        |  | T   | T   | T   | T    | T   | T   | T   | T   | T  | T   | C  | T  | C  | C  |
| TMEM43        | NM_024334        | 12d           | 3' UTR T>C           |                           |               | 14159720        |  | T   | T   | T   | T    | T   | T   | T   | T   | T  | T   | C  | T  | C  | C  |
| TMEM43        | NM_024334        | 12e           | IVS12 +58            | 1203 +1942                |               | 14160264        |  | 12  | 11  | 12  | 11   | 12  | 11  | 12  | 11  | 13 | 14  | 11 | 13 | 12 | 14 |



|               |                      |               |                        |                         |     |                 |  |     |     |     |     |     |     |     |     |     |     |     |     |     |     |
|---------------|----------------------|---------------|------------------------|-------------------------|-----|-----------------|--|-----|-----|-----|-----|-----|-----|-----|-----|-----|-----|-----|-----|-----|-----|
| SLC6A6        | NM_003043            | 1             | del 5'UTR              | 1 - 40823 del           |     | 14419313        |  | del |
| SLC6A6        | NM_003043            | 1             | del 5'UTR              | 1 - 40813 del           |     | 14419323        |  | del |
| SLC6A6        | NM_003043            | 1             | del 5'UTR              | 1 - 40805 del           |     | 14419331        |  | del |
| SLC6A6        | NM_003043            | 1             | del 5'UTR              | 1 - 40802 del           |     | 14419334        |  | del |
| <b>SLC6A6</b> | <b>NM_003043</b>     | <b>2</b>      | <b>G&gt;A 5'UTR</b>    | <b>1 - 27420</b>        |     | <b>14432716</b> |  | A   | G   | A   | G   | A   | G   | A   | G   | G   | G   | G   | G   | G   | G   |
| SLC6A6        | BC038790             | mRNA 1a       | C>G 5'UTR              |                         |     | 14435728        |  | G   | G   | G   | C   | G   | G   | G   | G   | G   | C   | G   | G   | C   | C   |
| SLC6A6        | BC038790             | mRNA 1b       | C>T 5'UTR              |                         |     | 14435919        |  | T   | T   | nd  | nd  | T   | T   | T   | C   | C   | C   | T   | T   | C   | C   |
| SLC6A6        | BC111489             | 5             | IVS5+46 G>T            | 599+46 G>T              |     | 14464374        |  | G   | G   | G   | G   | G   | T   | G   | T   | G   | G   | T   | G   | T   | T   |
| <b>SLC6A6</b> | <b>BC111489</b>      | <b>5</b>      | <b>IVS5+370 A&gt;G</b> | <b>c.599+370 A&gt;G</b> |     | <b>14464698</b> |  | G   | G   | G   | A   | G   | A   | G   | A   | A   | A   | A   | A   | A   | A   |
| SLC6A6        | AK023516-Ex1a        | mRNA 2        | IV6-1745 G>A           | 733-1745 G>A            |     | 14481283        |  | A   | A   | A   | G   | A   | A   | A   | A   | G   | G   | A   | G   | A   | A   |
| SLC6A6        | AK023516-Ex1a        | mRNA 2        | IV6-1541 T>C           | 733-1541 T>C            |     | 14481487        |  | C   | C   | C   | T   | C   | C   | C   | C   | T   | T   | C   | T   | C   | T   |
| SLC6A6        | AK023516-Ex1a        | mRNA 2        | IV6-1521 C>A           | 733-1521 C>A            |     | 14481507        |  | A   | A   | A   | C   | A   | A   | A   | A   | C   | C   | A   | C   | A   | C   |
| SLC6A6        | AK023516-Ex1a        | mRNA 2        | IV6-1392 G>A           | 733-1392 G>A            |     | 14481638        |  | A   | A   | A   | G   | A   | A   | A   | A   | G   | G   | A   | G   | A   | G   |
| SLC6A6        | AK023516-Ex1a        | mRNA 2        | IV6-1363 G>A           | 733-1363 G>A            |     | 14481665        |  | A   | A   | A   | G   | A   | A   | A   | A   | G   | G   | A   | G   | A   | G   |
| <b>SLC6A6</b> | <b>AK023516-Ex1b</b> | <b>mRNA 2</b> | <b>IV6-1226 A&gt;G</b> | <b>733-1226 A&gt;G</b>  |     | <b>14481802</b> |  | G   | G   | G   | A   | G   | A   | G   | A   | A   | A   | A   | A   | nd  | nd  |
| SLC6A6        | AK023516-Ex1c        | mRNA 2        | IV6-280 del A          | 733-280 del A           |     | 14482800        |  | del | wt  | nd  | nd  |
| SLC6A6        | NM_003043            | 15a           | 3'UTR del              |                         |     | 14501629        |  | del | wt  |
| SLC6A6        | NM_003043            | 15b           | 3'UTR G>A              |                         |     | 14502367        |  | A   | A   | A   | A   | A   | A   | A   | A   | A   | A   | A   | A   | A   | A   |
| SLC6A6        | NM_003043            | 15c           | 3'UTR C>G              |                         |     | 14502940        |  | C   | C   | C   | G   | C   | C   | C   | C   | C   | C   | C   | C   | C   | C   |
| SLC6A6        | NM_003043            | 15c           | 3'UTR C>G              |                         |     | 14502943        |  | G   | G   | G   | G   | G   | G   | G   | G   | G   | G   | G   | G   | G   | G   |
| SLC6A6        | NM_003043            | 15c           | 3'UTR T>C              |                         |     | 14503008        |  | C   | C   | C   | C   | C   | T   | C   | C   | C   | C   | C   | C   | C   | C   |
| SLC6A6        | NM_003043            | 15c           | 3'UTR T>C              |                         |     | 14503032        |  | C   | T   | C   | T   | C   | T   | C   | T   | C   | T   | C   | T   | T   | T   |
| SLC6A6        | NM_003043            | 15c           | 3'UTR del              |                         |     | 14503092        |  | wt  | del | wt  | wt  |
| SLC6A6        | NM_003043            | 15d           | 3'UTR C>T              |                         |     | 14503260        |  | T   | T   | T   | T   | T   | C   | T   | T   | T   | T   | T   | T   | T   | T   |
| SLC6A6        | NM_003043            | 15e           | 3'UTR G>T              |                         |     | 14503788        |  | G   | G   | G   | G   | G   | T   | G   | G   | G   | G   | G   | G   | G   | G   |
| SLC6A6        | NM_003043            | 15g           | 3'UTR del              |                         |     | 14505435        |  | wt  | del |
| SLC6A6        | NM_003043            | 15h           | 3' UTR A>G             |                         |     | 14505725        |  | A   | A   | A   | A   | A   | A   | A   | A   | A   | A   | A   | G   | A   | A   |
| GRIP2         | NM_001080423         | 23            | IVS22 -5 del           | 2974 -5 del             |     | 14513077        |  | wt  | wt  | wt  | del | wt  | wt  | nd  | nd  | wt  | wt  | wt  | wt  | wt  | wt  |
| GRIP2         | NM_001080423         | 22            | IVS22+20A>G            | 2973+20A>G              |     | 14520058        |  | A   | A   | A   | A   | A   | A   | A   | A   | A   | G   | A   | A   | A   | A   |
| GRIP2         | NM_001080423         | 21            | 2808 C>T               |                         | T>T | 14522186        |  | C   | C   | C   | C   | C   | C   | C   | T   | C   | C   | C   | C   | C   | C   |

|         |              |     |                         |                        |     |          |  |     |     |     |     |     |     |     |     |     |     |     |     |     |     |     |
|---------|--------------|-----|-------------------------|------------------------|-----|----------|--|-----|-----|-----|-----|-----|-----|-----|-----|-----|-----|-----|-----|-----|-----|-----|
| GRIP2   | NM_001080423 | 20  | IVS20 +101 C>T<br>C>T   | 2692 +101 C>T          |     | 14523212 |  | C   | C   | C   | T   | C   | C   | C   | C   | C   | nd  | nd  | nd  | nd  |     |     |
| GRIP2   | NM_001080423 | 20  | IVS19 -6 T>C            | 2513 -6 T>C            |     | 14523498 |  | T   | T   | T   | C   | T   | T   | T   | T   | T   | T   | C   | nd  | nd  |     |     |
| GRIP2   | NM_001080423 | 18  | 2256 T>C                |                        | S>S | 14526448 |  | T   | T   | T   | C   | T   | T   | T   | C   | T   | T   | nd  | nd  | T   | C   |     |
| GRIP2   | NM_001080423 | 16  | IVS15 -7 T>C            | 2015 -7 T>C            |     | 14527998 |  | T   | C   | T   | C   | T   | T   | T   | C   | T   | C   | C   | C   | C   | C   |     |
| GRIP2   | NM_001080423 | 14  | 1890 A>G                |                        | A>A | 14530220 |  | A   | A   | A   | G   | A   | A   | A   | G   | A   | A   | nd  | nd  | A   | G   |     |
| GRIP2   | NM_001080423 | 14  | IVS13 -49 A>G           | 1787 -49 A>G           |     | 14530371 |  | A   | A   | A   | G   | A   | A   | nd  | nd  | nd  | nd  | nd  | nd  | A   | G   |     |
| GRIP2   | NM_001080423 | 13  | IVS13 +42 ins<br>AACT   | 1787 +42 ins<br>AACT   |     | 14530762 |  | wt  | ins | wt  | wt  | nd  | nd  | wt  | wt  |     |
| GRIP2   | NM_001080423 | 13  | 1776 T>C                |                        | S>S | 14530815 |  | T   | T   | T   | T   | T   | T   | T   | C   | T   | T   | nd  | nd  | T   | T   |     |
| GRIP2   | NM_001080423 | 13  | IVS12 -35 G>A           | 1601 -35 G>A           |     | 14531025 |  | G   | G   | G   | G   | G   | G   | G   | A   | G   | G   | nd  | nd  | G   | G   |     |
| GRIP2   | NM_001080423 | 10  | 1309 ins                |                        |     | 14536633 |  | ins | nd  | nd  | ins | ins |     |
| GRIP2   | NM_001080423 | 8   | 894 T>C                 |                        | S>S | 14538262 |  | T   | T   | T   | C   | T   | T   | T   | T   | T   | T   | nd  | nd  | T   | C   |     |
| Marker  | D3S3595      |     |                         | Start 14617332         |     |          |  | 265 | 265 | 265 | nd  |     |
| C3orf19 | NM_016474    | 2   | IVS2+122 T>A            | 147+122 T>A            |     | 14671163 |  | nd  | nd  | nd  | nd  | T   | A   | nd  | nd  | nd  | nd  | nd  | T   | A   | T   | A   |
| C3orf19 | NM_016474    | 3   | IVS3+45C>A              | 248+45 C>A             |     | 14672185 |  | C   | C   | C   | C   | C   | C   | C   | C   | C   | C   | C   | C   | C   | C   | A   |
| C3orf19 | NM_016474    | 3   | IVS3+182 A>G            | 248+182 A>G            |     | 14672322 |  | G   | G   | G   | G   | G   | G   | G   | G   | G   | G   | G   | G   | A   | G   | A   |
| C3orf19 | NM_016474    | 5   | IVS4-55C>A              | 308 -55C>A             |     | 14677986 |  | A   | A   | A   | A   | nd  | nd  | A   | A   | A   | A   | nd  | nd  | A   | A   | A   |
| C3orf19 | NM_016474    | 5   | IVS5+83C>G &<br>T       | 485+83C>G &<br>T       |     | 14678301 |  | C   | C   | C   | C   | C   | C   | C   | C   | C   | C   | C   | C   | T   | C   | G   |
| C3orf19 | NM_016474    | 5   | IVS5+190<br>delTTACAATA | 485+190<br>delTTACAATA |     | 14678409 |  | del |
| C3orf19 | NM_016474    | 6   | IVS6+139<br>insTTGA     | 581+139<br>insGATT     |     | 14681773 |  | wt  | ins | ins | ins | ins |
| C3orf19 | NM_016474    | 6   | IVS6+140 A>G            | 581 +140 A>G           |     | 14681774 |  | G   | G   | G   | G   | G   | G   | G   | G   | G   | G   | G   | G   | A   | G   | A   |
| C3orf19 | NM_016474    | 6   | IVS6+141<br>insTTGG     | 581+141<br>insTTGG     |     | 14681775 |  | wt  | ins | wt  | ins | wt  | ins | wt  | ins | ins | ins | ins | wt  | wt  | wt  | wt  |
| C3orf19 | NM_016474    | 8   | IVS7 -13 A>G            | 724 -13 A>G            |     | 14683922 |  | G   | G   | G   | G   | G   | G   | G   | G   | G   | G   | G   | G   | G   | G   | G   |
| C3orf19 | NM_016474    | 8   | IVS8 +33 G>C            | 819 +33 G>C            |     | 14684062 |  | G   | G   | G   | G   | G   | G   | G   | G   | G   | C   | G   | G   | G   | G   | C   |
| C3orf19 | NM_016474    | 11C | 3'UTR G>A               | 1404+825 G>A           |     | 14688530 |  | A   | A   | A   | A   | A   | A   | A   | A   | A   | A   | A   | A   | A   | A   | A   |
| C3orf20 | NM_032137    | 2   | 5'UTR C>T               | 405-505 C>T            |     | 14698720 |  | C   | C   | C   | C   | C   | C   | C   | C   | C   | T   | C   | C   | C   | C   | T   |
| C3orf20 | NM_032137    | 2   | 5'UTR A>G               | 405-498 A>G            |     | 14698728 |  | A   | A   | A   | A   | A   | A   | A   | G   | A   | A   | A   | A   | A   | A   | A   |
| C3orf20 | NM_032137    | 2   | 5'UTR C>A               | 405-471 C>A            |     | 14698754 |  | A   | A   | A   | A   | A   | A   | A   | A   | A   | A   | A   | A   | A   | A   | A   |
| C3orf20 | NM_032137    | 3   | 125 G>A                 | 125G>A                 | G>D | 14699349 |  | G   | G   | G   | G   | G   | G   | G   | G   | G   | G   | G   | G   | G   | G   | A   |
| C3orf20 | NM_032137    | 3   | 193 G>A                 | 193 G>A                | D>N | 14699417 |  | G   | G   | G   | G   | G   | G   | G   | G   | G   | G   | G   | G   | A   | G   | A   |
| C3orf20 | NM_032137    | 7   | 892 G>A                 | 892 G>A                | A>T | 14720861 |  | A   | A   | A   | G   | A   | G   | A   | A   | A   | G   | A   | G   | A   | A   | A   |
| C3orf20 | NM_032137    | 8   | 1219 G>A                | 1219 A>G               | I>V | 14730576 |  | A   | G   | A   | G   | A   | G   | A   | A   | A   | G   | A   | G   | A   | A   | A   |
| C3orf20 | NM_032137    | 8   | 1264 G>C                | 1264 C>G               | L>V | 14730621 |  | G   | G   | G   | C   | G   | C   | G   | G   | G   | C   | G   | C   | G   | C   | G   |

|               |                  |                |                         |                        |               |                 |  |     |    |     |    |     |     |     |    |    |    |     |    |    |    |
|---------------|------------------|----------------|-------------------------|------------------------|---------------|-----------------|--|-----|----|-----|----|-----|-----|-----|----|----|----|-----|----|----|----|
| C3orf20       | NM_032137        | Ex9            | IVS8 -66 A>G            | 1314-66 A>G            |               | 14731734        |  | G   | G  | G   | G  | G   | G   | G   | G  | G  | G  | G   | G  | G  | G  |
| C3orf20       | NM_032137        | 11             | IVS11 +3 A>G            | 1690+3A>G              |               | 14743538        |  | A   | A  | A   | G  | A   | G   | A   | A  | A  | G  | A   | G  | A  | A  |
| C3orf20       | NM_032137        | 11             | IVS11 +23 G>A           | 1690+23G>A             |               | 14743558        |  | A   | A  | A   | G  | A   | G   | A   | A  | A  | G  | A   | G  | A  | A  |
| C3orf20       | NM_032137        | 13             | 2039 G>A                | 2039 G>A               | R>H           | 14773980        |  | G   | A  | G   | G  | G   | A   | G   | G  | G  | G  | G   | G  | G  | G  |
| C3orf20       | NM_032137        | 14             | 2334 G>A                | 2334 G>A               | V>V           | 14776491        |  | G   | A  | G   | G  | G   | A   | G   | G  | G  | G  | G   | G  | G  | G  |
| C3orf20       | NM_032137        | 14             | IVS14 +45 G>A           | 2352+45 G>A            |               | 14776554        |  | G   | A  | G   | A  | G   | A   | G   | A  | G  | A  | A   | A  | G  | A  |
| C3orf20       | NM_032137        | 16             | IVS16 +117G>C           | 2630+117G>C            |               | 14788839        |  | C   | C  | C   | G  | C   | C   | C   | C  | C  | G  | C   | C  | C  | G  |
| <b>FGD5</b>   | <b>NM_152536</b> | <b>1c</b>      | <b>934 G&gt;A</b>       | <b>934 G&gt;A</b>      | <b>V&gt;M</b> | <b>14837239</b> |  | A   | G  | A   | G  | A   | G   | A   | G  | G  | G  | G   | G  | G  | G  |
| <b>FGD5</b>   | <b>NM_152536</b> | <b>5&amp;6</b> | <b>IVS5 +22 G&gt;A</b>  | <b>2186+22 G&gt;A</b>  |               | <b>14914202</b> |  | G   | A  | G   | A  | G   | A   | G   | A  | A  | A  | A   | A  | A  | A  |
| <b>FGD5</b>   | <b>NM_152536</b> | <b>5&amp;6</b> | <b>IVS5 -82 G&gt;A</b>  | <b>2187 -82 G&gt;A</b> |               | <b>14914368</b> |  | G   | A  | G   | A  | G   | A   | G   | A  | A  | A  | A   | A  | A  | A  |
| <b>FGD5</b>   | <b>NM_152536</b> | <b>5&amp;6</b> | <b>2220 G&gt;T</b>      | <b>2220 G&gt;T</b>     | <b>L&gt;L</b> | <b>14914483</b> |  | G   | T  | G   | T  | G   | T   | G   | T  | T  | T  | T   | T  | T  | T  |
| FGD5          | NM_152536        | 8              | IVS8 +64 T>C            | 2482+64 T>C            |               | 14917028        |  | T   | T  | T   | C  | T   | T   | T   | T  | C  | C  | T   | C  | C  | C  |
| <b>FGD5</b>   | <b>NM_152536</b> | <b>10</b>      | <b>IVS10 +50 C&gt;T</b> | <b>2613+50 C&gt;T</b>  |               | <b>14924272</b> |  | C   | T  | C   | T  | C   | T   | C   | T  | T  | T  | T   | T  | T  | T  |
| FGD5          | NM_152536        | 15             | 3072 C>T                | 3072 C>T               | H>H           | 14939047        |  | C   | T  | C   | C  | C   | T   | C   | C  | C  | C  | C   | C  | C  | C  |
| <b>FGD5</b>   | <b>NM_152536</b> | <b>16</b>      | <b>IVS15 -74 G&gt;A</b> | <b>3085-74 G&gt;A</b>  |               | <b>14939483</b> |  | A   | G  | A   | G  | A   | G   | A   | G  | G  | G  | G   | G  | G  | G  |
| FGD5          | NM_152536        | 17             | IVS16-49 C>T            | 3215-49 C>T            |               | 14940470        |  | T   | T  | T   | T  | T   | T   | T   | T  | T  | T  | C   | T  | C  | T  |
| FGD5          | NM_152536        | 17             | IVS16-8 A>G             | 3215-8 A>G             |               | 14940511        |  | G   | G  | G   | G  | G   | G   | G   | G  | G  | G  | G   | G  | G  | G  |
| <b>NR2C2</b>  | <b>NM_003298</b> | <b>8</b>       | <b>IVS8+70 G&gt;A</b>   | <b>855+70 G&gt;A</b>   |               | <b>15040789</b> |  | A   | G  | A   | G  | A   | A   | A   | A  | G  | G  | G   | G  | G  | G  |
| NR2C2         | NM_003298        | 12             | IVS11-34 C>T            | 1290-34 C>T            |               | 15051147        |  | C   | C  | C   | C  | C   | C   | C   | C  | T  | C  | C   | C  | C  | T  |
| NR2C2         | NM_003298        | 14c            | 1635 G>A                | 1635 G>A               | Q/Q           | 15055700        |  | G   | G  | G   | G  | G   | G   | G   | A  | G  | G  | G   | G  | G  | A  |
| NR2C2         | NM_003298        | 15b            | 3'UTR A>G               |                        |               | 15059873        |  | A   | A  | A   | A  | A   | A   | A   | A  | A  | G  | A   | A  | A  | A  |
| <b>NR2C2</b>  | <b>NM_003298</b> | <b>15b</b>     | <b>3'UTR T&gt;A</b>     |                        |               | <b>15059884</b> |  | A   | T  | A   | T  | A   | A   | A   | T  | T  | T  | T   | T  | T  | T  |
| NR2C2         | NM_003298        | 15e            | 3'UTR C>T               |                        |               | 15061256        |  | C   | C  | C   | C  | C   | C   | C   | T  | C  | C  | C   | C  | C  | T  |
| <b>NR2C2</b>  | <b>NM_003298</b> | <b>15g</b>     | <b>3'UTR insGATA</b>    |                        |               | <b>15062484</b> |  | ins | wt | ins | wt | ins | isn | ins | wt | wt | wt | ins | wt | wt | wt |
| NR2C2         | NM_003298        | 15k            | 3'UTR C>G               |                        |               | 15064207        |  | C   | C  | C   | C  | C   | G   | C   | C  | C  | C  | C   | C  | C  | C  |
| NR2C2         | NM_003298        | 15k            | 3'UTR G>A               |                        |               | 15064452        |  | G   | G  | G   | G  | G   | G   | G   | G  | G  | G  | G   | G  | G  | A  |
| MRPS25        | NM_022497        | 4f             | 3' UTR A>G              | 522 +2704A>G           |               | 15066248        |  | A   | A  | A   | A  | A   | A   | A   | A  | A  | A  | A   | A  | A  | G  |
| MRPS25        | NM_022497        | 4f             | 3' UTR T>C              | 522 +2700T>C           |               | 15066252        |  | C   | T  | C   | T  | C   | C   | C   | T  | T  | T  | C   | T  | T  | T  |
| MRPS25        | NM_022497        | 4d             | 3' UTR T>C              | 522 +1875T>C           |               | 15067077        |  | T   | T  | T   | T  | T   | T   | T   | C  | T  | T  | T   | T  | T  | C  |
| <b>MRPS25</b> | <b>NM_022497</b> | <b>4c</b>      | <b>3' UTR G&gt;A</b>    | <b>522+1059G&gt;A</b>  |               | <b>15067893</b> |  | A   | G  | A   | G  | A   | G   | A   | G  | G  | G  | G   | G  | G  | G  |
| MRPS25        | NM_022497        | 4a             | 3' UTR A>T              | 522+192A>T             |               | 15068761        |  | A   | A  | A   | A  | A   | A   | A   | T  | A  | A  | A   | A  | A  | A  |
| MRPS25        | NM_022497        | 2              | IVS2 +75 C>T            | 241+75 C>T             |               | 15075805        |  | nd  | nd | C   | T  | C   | T   | C   | T  | C  | C  | C   | T  | C  | C  |



|              |                  |                  |                        |                        |     |                 |  |          |          |          |          |          |          |          |          |          |          |          |          |          |           |           |
|--------------|------------------|------------------|------------------------|------------------------|-----|-----------------|--|----------|----------|----------|----------|----------|----------|----------|----------|----------|----------|----------|----------|----------|-----------|-----------|
| ZFYVE2<br>0  | NM_022340        | 14g              | 3'UTR T>C              |                        |     | 15088127        |  | C        | T        | C        | T        | C        | C        | C        | C        | T        | T        | C        | T        | C        | T         |           |
| ZFYVE2<br>0  | NM_022340        | 14g              | 3'UTR T>A              |                        |     | 15088307        |  | T        | T        | T        | T        | T        | T        | T        | T        | T        | T        | T        | T        | T        | A         |           |
| ZFYVE2<br>0  | NM_022340        | 14g              | 3'UTR G>A              |                        |     | 15088523        |  | A        | G        | A        | G        | A        | A        | A        | A        | G        | G        | A        | G        | A        | G         |           |
| ZFYVE2<br>0  | NM_022340        | 14e              | 3'UTR insA /<br>AA ??  |                        |     | 15089241        |  | wt       | wt       | wt       | wt       | wt       | ins      | nd       | nd       | wt       | wt       | wt       | wt       | wt       | ins       |           |
| ZFYVE2<br>0  | NM_022340        | 14c              | 3'UTR C>A              |                        |     | 15090274        |  | A        | C        | A        | C        | A        | A        | A        | A        | C        | C        | A        | C        | A        | C         |           |
| ZFYVE2<br>0  | NM_022340        | 14b              | 1734 C>G               |                        | S>S | 15090914        |  | C        | C        | C        | C        | C        | C        | C        | C        | C        | C        | C        | C        | C        | G         |           |
| ZFYVE2<br>0  | NM_022340        | 6                | IVS5 -55 delTC         | 290 -55 delTC          |     | 15102527        |  | del      | wt       | del      | wt       | del      | del      | del      | del      | wt       | wt       | del      | wt       | del      | wt        |           |
| CAPN7        | NM_014296        | 1                | 5'UTR A>G              |                        |     | 15222800        |  | G        | G        | nd       | nd       | nd       | nd       | nd       | nd       | G        | A        | G        | G        | G        | G         |           |
| CAPN7        | NM_014296        | 6                | IVS5-160A>G            | 639-160A>G             |     | 15239826        |  | A        | A        | A        | A        | A        | G        | A        | A        | A        | A        | A        | A        | A        | A         |           |
| <b>CAPN7</b> | <b>NM_014296</b> | <b>11</b>        | <b>IVS11+68 C&gt;T</b> | <b>1286 +68 C&gt;T</b> |     | <b>15250552</b> |  | <b>T</b> | <b>C</b> | <b>T</b> | <b>C</b> | <b>T</b> | <b>C</b> | <b>T</b> | <b>C</b>  |           |
| CAPN7        | NM_014296        | 12               | IVS12+150<br>G>A       | 1407 +150G>A           |     | 15251806        |  | G        | A        | G        | A        | G        | A        | G        | A        | G        | A        | G        | A        | G        | A         |           |
| <b>CAPN7</b> | <b>NM_014296</b> | <b>13&amp;14</b> | <b>IVS12-28 T&gt;C</b> | <b>1408 -28 T&gt;C</b> |     | <b>15256956</b> |  | <b>C</b> | <b>T</b> | <b>C</b> | <b>T</b> | <b>C</b> | <b>T</b> | <b>C</b> | <b>T</b> | <b>T</b> | <b>T</b> | <b>T</b> | <b>T</b> | <b>T</b> | <b>nd</b> | <b>nd</b> |
| CAPN7        | NM_014296        | 19               | IVS18-78 del           | 2074 -78del            |     | 15263760        |  | wt       | del       | wt        |
| SH3BP5       | NM_004844        | 9b               | 3'UTR del              | 1368+498 del           |     | 15272099        |  | nd       | nd       | wt       | del      | nd       | nd       | wt       | del      | wt       | del      | wt       | del      | wt       | del       | wt        |
| SH3BP5       | NM_004844        | 9a               | 3'UTR G>A              | 1368+23 G>A            |     | 15272574        |  | G        | G        | G        | G        | G        | G        | G        | G        | G        | A        | G        | G        | G        | G         |           |
| SH3BP5       | NM_004844        | 8                | 961 G>A                |                        | V>M | 15273553        |  | G        | G        | G        | G        | G        | G        | G        | G        | G        | G        | G        | G        | A        | G         | G         |
| SH3BP5       | NM_004844        | 6                | IVS5-53 C>T            | 627-53 C>T             |     | 15276367        |  | T        | C        | nd       | nd       | T        | T        | T        | C        | T        | C        | T        | T        | T        | T         |           |
| SH3BP5       | NM_004844        | 6                | IVS5-79 G>C            | 627-79G>C              |     | 15276393        |  | G        | C        | nd       | nd       | G        | C        | G        | C        | G        | C        | G        | C        | G        | C         |           |
| SH3BP5       | NM_004844        | 4                | 390 T>C                |                        | R>R | 15286329        |  | C        | T        | C        | C        | C        | C        | C        | C        | T        | T        | C        | T        | C        | T         |           |
| SH3BP5       | NM_004844        | 4                | IVS3-80 C>A            | 331-80 C>A             |     | 15286468        |  | A        | A        | A        | A        | A        | A        | A        | A        | A        | A        | A        | A        | A        | A         |           |
| Marker       | <i>D3S3613</i>   |                  |                        | Start 15336926         |     |                 |  | 193      | 197      | 193      | nd        |           |
| SH3BP5       | NM_001018009     | 1                | 5'UTR A>G              | 1-71626 A>G            |     | 15357874        |  | A        | A        | A        | A        | A        | A        | A        | A        | A        | A        | A        | A        | G        | A         | A         |

Two hundred and forty sequencing variants were identified in the 20 *ARVD5* candidate genes. Nineteen variants were found exclusively in subjects who were clinically affected (bold). The *ARVD5* ancestral haplotype is in the left column of affected individuals. Markers used by Ahmad et al. (1998) are in italics. Note that the subjects screened were not the same subjects used to narrow the region (Figure 3).
